# Supplementary material
Source: PubMed Central journal article supplement (PMC2745188)
Supplement: NIHMS106669-supplement-supplement_1.pdf [file NIHMS106669-supplement-supplement_1.pdf]

## Pediatric Heart Network Investigators

Children's Hospital, Boston - D.R.Fulton, R.P.Sundel, S.Colan, A.L.Woodward,  
F.Dedeoglu, S.Kim, R.Fuhlbrigge, B.Binstadt; Children's Hospital of Los Angeles -  
M.Takahashi, V.Guerrero; Children's Hospital of Philadelphia - A.Hogart, S.Paridon,  
J.Rychik, M.Harkins; Columbia University Medical Center - W.Gersony, L.Imundo,  
D.Levy, D.Hsu, S.Mital; Duke University Medical Center - P.Anderson, A.M.Nawrocki,  
D.Harrington; Hospital for Sick Children - B.W.McCrindle, T.Bradley, R.Yeung;  
Medical University of South Carolina - G.Shirali, M.Scheurer, A.Jones; Primary  
Children's Medical Center - R.V.Williams, D.U.Frank, L.Y.Tani, A.L.Smart; Data  
Coordinating Center: New England Research Institutes - L.Sleeper, P.Nash, D.Gallagher,  
P.D.Mitchell; Study Sponsor: National Heart, Lung, and Blood Institute - G.D.Pearson,  
V.Pemberton, M.Stylianou, J.Massicot-Fisher, T.Hoke, L.Mahoney (network chair).

## PHN Kawasaki Disease Code List E

## Code List E

| Code                         | Associated Findings and Events                      |
|------------------------------|-----------------------------------------------------|
| <b>Non-cardiac diagnoses</b> |                                                     |
| A-0001                       | Abdominal pain                                      |
| A-0002                       | Acne                                                |
| A-0003                       | Anaphylaxis                                         |
| A-0004                       | Anemia (Hct <30 mg/dl)                              |
| A-0005                       | Anterior Uveitis (documented by ophthalmology exam) |
| A-0006                       | Arthralgia                                          |
| A-0007                       | Arthritis, proximal interphalangeal (PIP) joints    |
| A-0008                       | Arthritis, distal interphalangeal (DIP) joints      |
| A-0009                       | Arthritis, ankles                                   |
| A-0010                       | Arthritis, elbows                                   |
| A-0011                       | Arthritis, hips                                     |
| A-0012                       | Arthritis, knees                                    |
| A-0013                       | Arthritis, shoulders                                |
| A-0014                       | Arthritis, wrists                                   |
| A-0015                       | Aseptic meningitis (confirmed by Lumbar Puncture)   |
| A-0016                       | Beau's lines                                        |
| A-0017                       | Blurred vision                                      |
| A-0018                       | Bulbar conjunctivitis                               |
| A-0019                       | Cervical lymphadenopathy (>1.5 cm)                  |
| A-0020                       | Complication of IV line                             |
| A-0021                       | Cough                                               |
| A-0022                       | Cyanosis                                            |
| A-0023                       | Death                                               |
| A-0024                       | Desquamation, genitourinary area                    |
| A-0025                       | Desquamation, lips                                  |
| A-0026                       | Diabetes Insipidus                                  |
| A-0027                       | Diarrhea                                            |
| A-0028                       | Dyspnea                                             |
| A-0029                       | Dysuria                                             |
| A-0030                       | Elevated liver function tests (>2x normal)          |
| A-0031                       | Encephalitis                                        |
| A-0032                       | Erythema, palms                                     |
| A-0033                       | Erythema, soles                                     |
| A-0034                       | Excema                                              |
| A-0035                       | Fluid retention/Edema                               |
| A-0036                       | Flushing                                            |
| A-0037                       | Headache                                            |
| A-0038                       | Hearing loss                                        |
| A-0039                       | Hemolytic anemia                                    |
| A-0040                       | Hives                                               |
| A-0041                       | Hydrops of gall bladder (documented by ultrasound)  |
| A-0042                       | Hyperglycemia (glucose >150 mg/dl)                  |

## PHN Kawasaki Disease Code List E

|                          |                                                |
|--------------------------|------------------------------------------------|
| A-0043                   | Hypertension (SBP>95 <sup>th</sup> percentile) |
| A-0044                   | Hypotension (SBP<5 <sup>th</sup> percentile)   |
| A-0045                   | Increased appetite                             |
| A-0046                   | Insomnia                                       |
| A-0047                   | Irritability                                   |
| A-0048                   | Mood changes                                   |
| A-0049                   | Nervousness                                    |
| A-0050                   | Pancreatitis                                   |
| A-0051                   | Periungual desquamation, hands                 |
| A-0052                   | Periungual desquamation, feet                  |
| A-0053                   | Pneumonia (documented by chest x-ray)          |
| A-0054                   | Pseudotumor cerebri                            |
| A-0055                   | Psoriasis                                      |
| A-0056                   | Pustular psoriasis                             |
| A-0057                   | Rash, new onset                                |
| A-0058                   | Rash, hives                                    |
| A-0059                   | Rash, eczema                                   |
| A-0060                   | Rash, pustular psoriasis                       |
| A-0061                   | Renal failure (Creatinine >1.5 mg/dl)          |
| A-0062                   | Rhinorrhea                                     |
| A-0063                   | Rigors                                         |
| A-0064                   | Sepsis, suspected (not confirmed)              |
| A-0065                   | Sepsis (confirmed by blood cultures)           |
| A-0066                   | Shock                                          |
| A-0067                   | Seizures                                       |
| A-0068                   | Small bowel obstruction                        |
| A-0069                   | Sterile pyuria                                 |
| A-0070                   | Strawberry tongue                              |
| A-0071                   | Strep throat (confirmed by throat culture)     |
| A-0072                   | Sudden increase in fever                       |
| A-0073                   | Torticollis                                    |
| A-0074                   | Vomiting                                       |
| A-0075                   | Weakness                                       |
| A-9999                   | Other non-cardiac, specify                     |
| <b>Cardiac diagnoses</b> |                                                |
| B-0001                   | Aneurysms (peripheral aneurysms)               |
| B-0002                   | Angina                                         |
| B-0003                   | Arrhythmia                                     |
| B-0004                   | Cardiac arrest                                 |
| B-0005                   | Cardiac catheterization                        |
| B-0006                   | Cardiogenic shock                              |
| B-0007                   | Chest pain, not likely to be cardiac           |
| B-0008                   | Chest pain, cardiac related                    |
| B-0009                   | Congestive Heart Failure (CHF)                 |
| B-0010                   | Dizziness, complaints of                       |
| B-0011                   | Exercise intolerance (by history)              |
| B-0012                   | Gallop                                         |
| B-0013                   | Myocardial infarction (confirmed)              |

## PHN Kawasaki Disease Code List E

|        |                                         |
|--------|-----------------------------------------|
| B-0014 | Myocardial infarction (suspected)       |
| B-0015 | Myocardial ischemia (fixed defect)      |
| B-0016 | Myocardial ischemia (reversible defect) |
| B-0017 | New onset CHF, weight gain              |
| B-0018 | New onset CHF, hepatomegaly             |
| B-0019 | New onset CHF, pulmonary edema          |
| B-0020 | New onset CHF, cardiac enlargement      |
| B-0021 | New onset CHF, gallop                   |
| B-0022 | Palpitations                            |
| B-0023 | Syncope                                 |
| B-0024 | Tachycardia (sinus rhythm >200 bpm)     |
| B-9999 | Other cardiac, specify                  |
